# Supplementary material
Source: Springer Nature journal article supplement (https://www.springermedizin.de/resource/supplementary/12889_2009_1857_MOESM2_ESM.pdf/9504202)

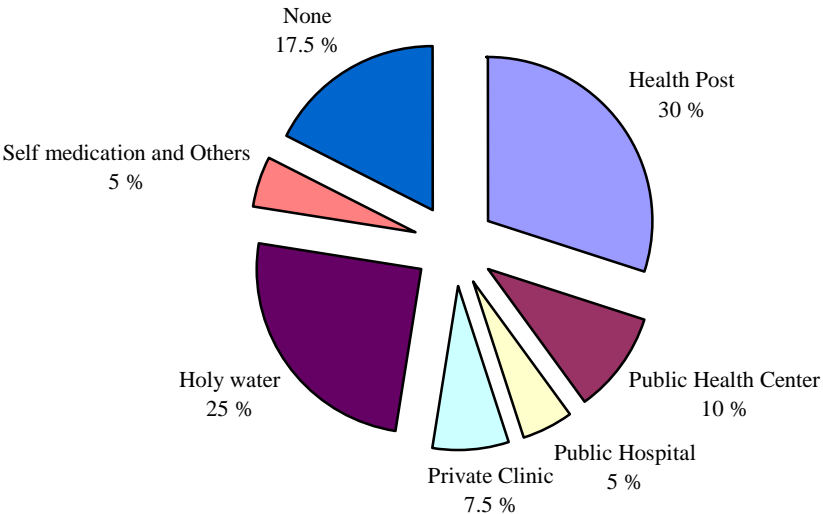

Supplement: MOESM2 [file 9504202]
